# Supplementary material
Source: Springer Nature journal article supplement (https://www.springermedizin.de/resource/supplementary/12985_2007_331_MOESM5_ESM.pdf/9607538)

PBS  
  14C2 (G1)  
  14C2-S1 (G2b)  
  14C2-S1-4 (G2a)

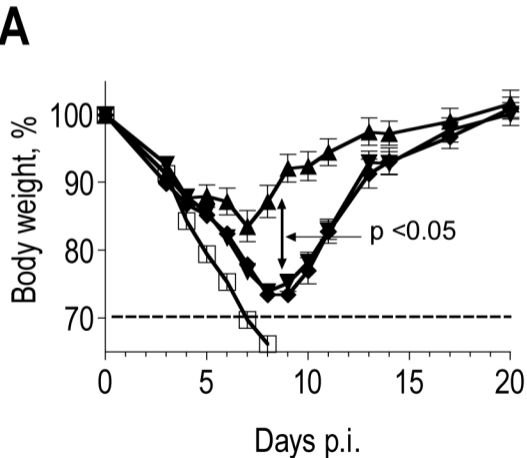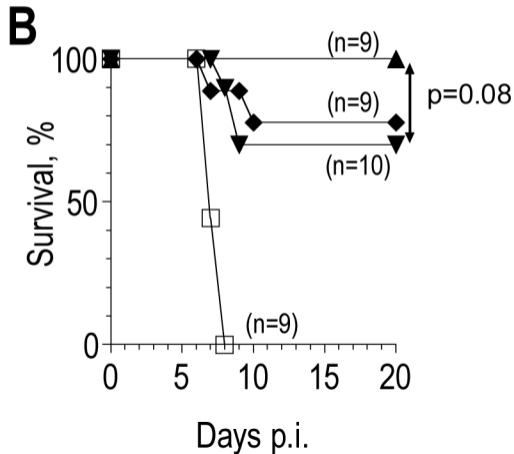

Supplement: MOESM5 [file 9607538]
